# Supplementary material
Source: publisher figshare collection journal article supplement (https://acs.figshare.com/ndownloader/files/5310469)
Supplement: Supplementary file 1 [file 5310469]

## **Influence of phytoplankton on fate and effects of modified zero-valent iron nanoparticles**

*Adeyemi S. Adeleye<sup>\*,†,§,||</sup>, Louise M. Stevenson<sup>‡,§,||</sup>, Yiming Su<sup>‡,†,§,||</sup>, Roger M. Nisbet<sup>‡,§</sup>, Yalei Zhang<sup>‡</sup>, Arturo A. Keller<sup>\*\*,†,§</sup>*

<sup>†</sup>Bren School of Environmental Science & Management, University of California, Santa Barbara,  
CA 93106-5131, USA

<sup>‡</sup>Department of Ecology, Evolution and Marine Biology, University of California, Santa Barbara,  
CA 93106-5131, USA

<sup>‡</sup>State Key Laboratory of Pollution Control and Resource Reuse, Tongji University, Shanghai  
200092, China

<sup>§</sup>University of California Center for Environmental Implications of Nanotechnology, Santa  
Barbara, California, USA

## **Supporting Information**

## SUMMARY OF SUPPORTING INFORMATION (SI)

### Methods

|      |                                                        |    |
|------|--------------------------------------------------------|----|
| S1.0 | Synthesis of FeSSi.....                                | 4  |
| S2.0 | Culture Media and Characterization.....                | 5  |
| S3.0 | Aggregation kinetics of FeSSi.....                     | 7  |
| S4.0 | FeSSi-Algal Model.....                                 | 8  |
| S5.0 | Environmental Scanning Electron Microscopy (ESEM)..... | 16 |

### Tables

|          |                                                                                                         |    |
|----------|---------------------------------------------------------------------------------------------------------|----|
| Table S1 | Composition of COMBO media (Adapted from Kilham et al.1998).....                                        | 6  |
| Table S2 | Dynamic FeSSi algal model.....                                                                          | 14 |
| Table S3 | Parameters for FeSSi-algal model.....                                                                   | 15 |
| Table S4 | Properties of media with and without <i>C. reinhardtii</i> cells.....                                   | 20 |
| Table S5 | Band assignments for FTIR spectrum of organic matter produced by <i>Chlamydomonas reinhardtii</i> ..... | 22 |
| Table S6 | Elemental composition of solid phase via XPS analyses.....                                              | 27 |

### Figures

|           |                                                                                                                                                                                                                                                                                            |    |
|-----------|--------------------------------------------------------------------------------------------------------------------------------------------------------------------------------------------------------------------------------------------------------------------------------------------|----|
| Figure S1 | Fits of the FeSSi-Algal model to cultures in exponential growth phase (Day 1 cultures) to algal biomass (a) and DOC concentration (b) and the model predictions for the concentration of bioavailable FeSSi through time (up to day 5, at which time all of the FeSSi is inactivated)..... | 11 |
| Figure S2 | Fits of the FeSSi-Algal model to cultures in slowing growth phase (Day 1 cultures) to algal biomass (a) and DOC concentration (b) and the model predictions for the concentration of bioavailable FeSSi through time (up to day 5, at which time all of the FeSSi is inactivated).....     | 13 |
| Figure S3 | Scanning electron micrographs and EDS spectra of the surface of pristine FeSSi showing different states of iron, fully oxidized (A), and partially oxidized (B)...                                                                                                                         | 17 |

|            |                                                                                                                                                                         |    |
|------------|-------------------------------------------------------------------------------------------------------------------------------------------------------------------------|----|
| Figure S4  | Effect of pH on zeta potential of FeSSi. Isoelectric point (IEP) $\approx$ pH 7.4.....                                                                                  | 18 |
| Figure S5  | Aggregation kinetics of FeSSi in DI, Day 1 (1-d), Day 2 (2-d), and Day 11 (11-d) media.....                                                                             | 19 |
| Figure S6  | FTIR spectrum of organic matter produced by <i>Chlamydomonas reinhardtii</i> . Detailed band assignments are provided in SI Table S2.....                               | 21 |
| Figure S7  | FeSSi in Day 1 and Day 11 <i>C. reinhardtii</i> media right after dosing with nanoparticles. FeSSi stock was stirred in either Day 1 or Day 11 media before dosing..... | 23 |
| Figure S8  | Concentrations of dissolved Fe, S, and Si detected in 1-d and 11-d cultures of <i>C. reinhardtii</i> in the presence of 1.8, 18, and 180 mg/L of FeSSi particles.....   | 24 |
| Figure S9  | Dissolved organic carbon (DOC), a proxy for algal organic matter, in aqueous phase of <i>C. reinhardtii</i> cultures.....                                               | 25 |
| Figure S10 | XPS spectra of <i>C. reinhardtii</i> culture cells in the presence and absence of FeSSi.....                                                                            | 26 |
| Figure S11 | High resolution scans of O 1s in 1-d and 11-d cultures.....                                                                                                             | 28 |
| Figure S12 | Nominal concentrations of chlorophyll a (Chl a) detected after exposure of FeSSi to <i>C. reinhardtii</i> at exponential (1-d) and slowing growth (11-d) phases.....    | 29 |
| Figure S13 | Electron spin resonance (ESR) spectra of FeSSi and nZVI showing the production of reactive oxygen species (ROS).....                                                    | 30 |

### **S1.0 Synthesis of FeSSi**

Briefly, 250 ml mixture containing 7.6 g sodium borohydride (Oakwood Chemical), 1.5 g dithionite (Sigma-Aldrich), and 0.2 mL of colloidal silica (30 wt.% in water) was titrated into 250 ml solution containing 4.9 g  $\text{FeCl}_3$  (Fisher Scientific). After reduction, nanoparticles were collected and triple-washed with nitrogen-purged deionized water (DI, 18.2 M $\Omega$ .cm, Barnstead Nanopure Diamond). A neodymium-iron-boron magnet was used to separate solids and liquids. Fresh FeSSi particles were stored in 30% ethanol at 4 °C until use.

## **S2.0 Culture Media and Characterization**

To obtain media with algal natural organic matter (algal NOM), batches of 2-d and 11-d cultures were centrifuged (7500 g, 15 min, 4 °C, Sorvall RC-5B Plus) and then filtered (0.2 µm PES membrane, Thermo Scientific) in aseptic conditions to produce 2-d and 11-d media, respectively. Sterile COMBO media was used as 1-d media. The media were characterized by measuring dissolved organic carbon (DOC) and total dissolved nitrogen (TDN) using a Shimadzu TOC-V with an attached TNM1 unit, pH (Oakton EW-35811-71, Cole Parmer), conductivity (HACH IntelliCAL CDC401), and dissolved oxygen (HACH LDO Model 2). Functional groups present in algal NOM were characterized by analyzing freeze-dried 11-d media (Labconco 7754042) via infrared spectroscopy using a Nicolet iS10 spectrometer with a diamond ATR crystal. Interferograms were obtained by taking 256 scans (resolution = 2 cm<sup>-1</sup>).

**Table S1.** Composition of COMBO media (Adapted from Kilham *et al.*1998)

| Compound                                            | Concentration |                |
|-----------------------------------------------------|---------------|----------------|
|                                                     | (mg/L)        | ( $\mu$ mol/L) |
| CaCl <sub>2</sub> .2H <sub>2</sub> O                | 36.76         | 250            |
| MgSO <sub>4</sub> .7H <sub>2</sub> O                | 36.97         | 150            |
| K <sub>2</sub> HPO <sub>4</sub>                     | 8.71          | 50             |
| NaNO <sub>3</sub>                                   | 85.01         | 1000           |
| NaHCO <sub>3</sub>                                  | 12.60         | 150            |
| Na <sub>2</sub> SiO <sub>3</sub> .9H <sub>2</sub> O | 24.42         | 100            |
| H <sub>3</sub> BO <sub>3</sub>                      | 24.00         | 388            |
| KCl                                                 | 7.45          | 100            |
| Na <sub>2</sub> EDTA.2H <sub>2</sub> O              | 4.36          | 11.7           |
| FeCl <sub>3</sub> .6H <sub>2</sub> O                | 1.00          | 3.7            |
| MnCl <sub>2</sub> .4H <sub>2</sub> O                | 0.18          | 0.9            |
| CuSO <sub>4</sub> .5H <sub>2</sub> O                | 0.001         | 0.004          |
| ZnSO <sub>4</sub> .7H <sub>2</sub> O                | 0.022         | 0.08           |
| CoCl <sub>2</sub> .6H <sub>2</sub> O                | 0.012         | 0.05           |
| Na <sub>2</sub> MoO <sub>4</sub> .2H <sub>2</sub> O | 0.022         | 0.09           |
| H <sub>2</sub> SeO <sub>3</sub>                     | 0.0016        | 0.012          |
| Na <sub>3</sub> VO <sub>4</sub>                     | 0.0018        | 0.01           |
| LiCl                                                | 0.31          | 7.3            |
| RbCl                                                | 0.07          | 0.6            |
| SrCl <sub>2</sub> .6H <sub>2</sub> O                | 0.15          | 0.57           |
| NaBr                                                | 0.016         | 0.16           |
| KI                                                  | 0.0033        | 0.02           |
| Vitamin B <sub>12</sub>                             | 0.00055       | 0.0004         |
| Biotin                                              | 0.0005        | 0.002          |
| Thiamin                                             | 0.1           | 0.3            |

### S3.0 Aggregation kinetics of FeSSi

The initial aggregation rate constant ( $k$ ) reflects doublet formation and is proportional to the initial rate of increase in the intensity-weighted hydrodynamic radius,  $a_h(t)$ , with time,  $t$ , and the inverse of initial number concentration of nanoparticles,  $N_0$  (Eq. 1):

$$k \propto \frac{1}{N_0} \left( \frac{da_h(t)}{dt} \right)_{t \rightarrow 0} \quad (1)$$

$k$  is obtained from the slope of the best fit line of  $(da_h(t)/dt)_{t \rightarrow 0}$ , which is determined via DLS using the Zetasizer. Attachment efficiencies ( $\alpha$ ) of FeSSi in 1-d, 2-d, and 11-d media were derived by normalizing the measured  $k$  by the diffusion-limited aggregation rate constant  $(k)_{fav}$  (Eq. 2).  $(k)_{fav}$  was determined in highly favorable aggregation conditions.

$$\alpha = \frac{\left( \frac{da_h(t)}{dt} \right)_{t \rightarrow 0}}{\left( \frac{da_h(t)}{dt} \right)_{t \rightarrow 0, fav}} \quad (2)$$

#### **S4.0 FeSSi-Algal Model**

The model state variables and equations are defined in Table 2. Parameters and their fitted values are in Table 3

##### *Algal biomass*

We used chlorophyll a concentration as a proxy for algal biomass. Algal growth is modeled using the logistic equation.

##### *DOC concentration*

DOC was used as a proxy for algal organic matter. As in Stevenson et al. (2013), we assumed that DOC production rate is the sum of rates proportional to algal growth rate and population size, since DOC excretion depends on photosynthesis, maintenance, and growth. We also included a loss term to account for DOC removal due to heteroaggregation of DOC with FeSSi. DOC could be lost from the measured DOC pool due to heteroaggregation if the DOC already bound to FeSSi may no longer be available to bind to other FeSSi particles, thus decreasing the concentration of available DOC; This latter hypothesis is supported by aggregation data showed that FeSSi can aggregate up to a micron in size within an hour (Figure S5).

##### *Bioavailable and inactivated FeSSi*

Bioavailable FeSSi is assumed to be inactivated when coated by DOC. In exponentially growing cultures that started at a very low cell concentration, all the added FeSSi particles were bioavailable when introduced into the cultures. However, FeSSi particles were a mix of bioavailable and inactivated particles when introduced to 11 day old cultures (see next section).



### *Parameter fitting and model development*

We tested out a few other model formulations by fitting the models to our data and comparing the overall fits. The final two models considered were nested models – the reduced model (with fewer parameters) was identical to the full model (the final model described in this paper) except that it did not include  $\beta$ . We chose between these two models (with or without the parameter  $\beta$ ) by calculating the negative log(likelihood) values of the final model functions and conducting a Likelihood Ratio Test. The test statistic,  $D$ , was 7.318 (two times the difference of the loglikelihood values) with 1 degree of freedom. We calculated a p-value assuming that the test statistic is approximately chi-squared distributed. This p-value was 0.0068 (less than 0.05), so we were able to reject the null hypothesis (reduced model) and continued our analysis using the full model defined in this paper.

All seven parameters in Table S3 were estimated simultaneously for all treatments by fitting the model to our chlorophyll *a* data (algal biomass) and DOC concentration measurements. We used the BYOM (“Bring Your Own Model”) platform for parameter estimation, developed by Tjalling Jager for Matlab (<http://debttox.info>). BYOM finds parameters that minimize the value of the negative log(likelihood) function.

Along with parameter values, we also fitted the initial values of both stages of algal growth (within the range of observed starting populations within all cultures of the same age), the initial concentration of DOC in the Day 1 cultures (we know the initial concentration of DOC in the Day 11 cultures due to good overlap between DOC data from cultures that started on Day 1 and Day 11 of growth), and the starting concentration of bioavailable FeSSi particles in Day 11 culture exposures. We fit the initial value of bioavailable FeSSi in Day 11 cultures because the

stock suspension of FeSSi particles was added to media from 11-day-old algal cultures (with the algal cells removed) and mixed for 1 hour prior to exposure. This means that the algal-produced DOC had an hour to interact with the particles, during which time DOC may have begun inactivating FeSSi particles prior to exposure. Model parameterization leads us to believe this occurred – the model overestimates the initial toxic response of 180 mg-FeSSi/L to 11 day old cultures unless  $C_{N11}(0)$  was allowed to be less than  $6 * 10^{13}$  FeSSi particles/L (the model gives the best fit when 70% of the particles have been inactivated by DOC prior to dosing).

Parameters relating to algal growth and DOC production,  $r$ ,  $K$ ,  $h_{DN}$  and  $k_{DN}$  were initially fit to control data only. FeSSi-related parameters ( $k_f$ ,  $\gamma_{UN}$ ,  $\beta$  and  $C_{N11}(0)$ ) were fit to all treatments simultaneously with  $r$ ,  $K$ ,  $h_{DN}$  and  $k_{DN}$  fixed. Once we had good estimates for the parameters, we fit all parameters to all data sets simultaneously with different allowances – FeSSi-related parameters ( $k_f$ ,  $\gamma_{UN}$ ,  $\beta$  and  $C_{N11}(0)$ ) were given a wide range of potential values (large minimum and maximum parameter estimation limits) while parameters that were initially fit to control data only ( $r$ ,  $K$ ,  $h_{DN}$  and  $k_{DN}$ ) were allowed to vary within a small range of the control fit values (minimum and maximum parameter values for these were +/- 5-15% of the control fit parameter estimate) for the final parameter set.

#### *Potential model refinements*

The model could be refined at the cost of adding more parameters, which did not seem prudent given the data we had available. Some potential model elaborations are:

- 1) *Mechanistic algal model* – we used the phenomenological logistic growth equation to model phytoplankton, which is an obvious oversimplification of algal growth. We could

use a mechanistic model of nutrient limited algal growth, but this would involve at least 3 additional parameters.

- 2) *DOC addition from algal mortality* – dead algal cells could provide a significant addition of DOC to algal cultures.
- 3) *Nanoparticle exposure altering DOC production* – nanomaterial exposure may alter algal DOC production, which could help explain the mismatch between our model's prediction and DOC concentrations of algal cultures in slowing growth phase exposed to the highest concentration of FeSSi.

#### a) 1 day old cultures - algal population and bioavailable FeSSi concentration

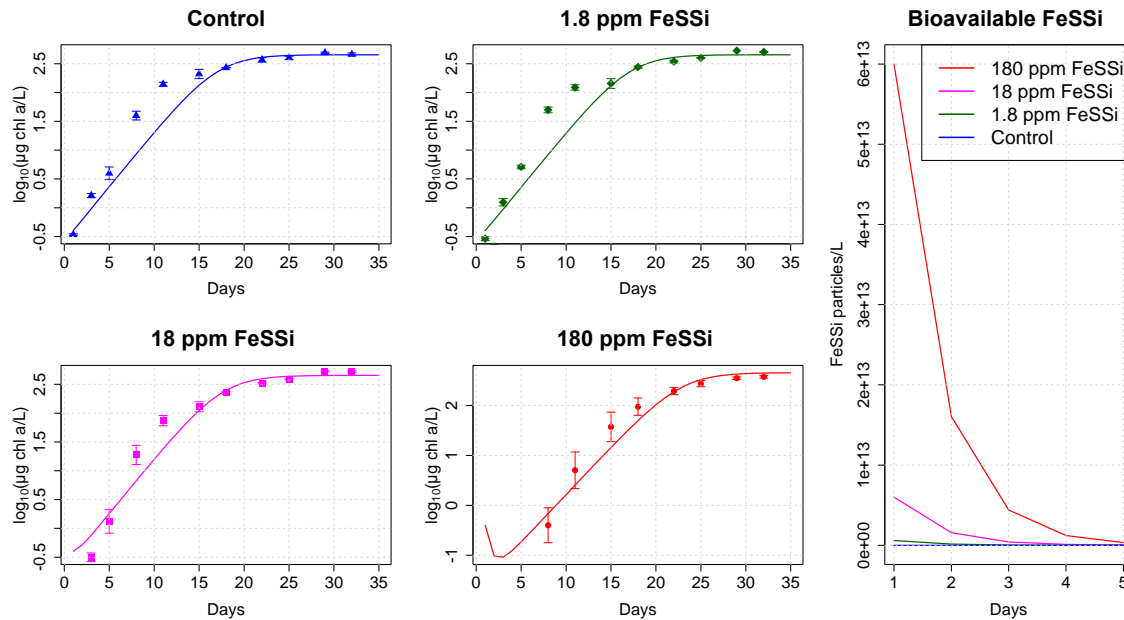

**b) 1 day old cultures - algal population and bioavailable FeSSi concentration**

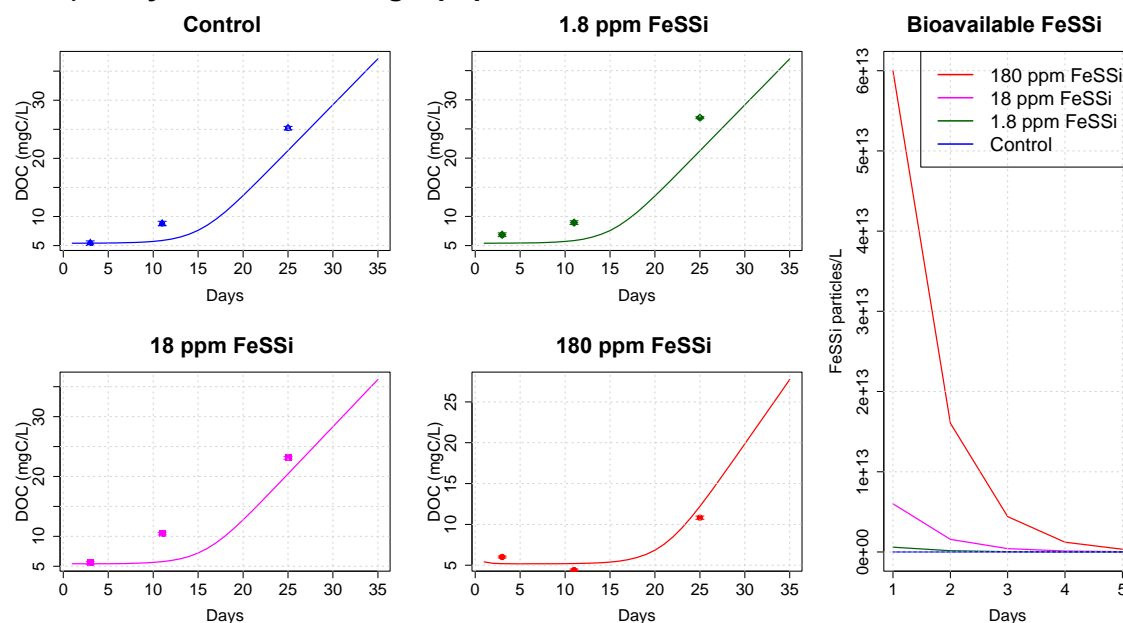

**Figure S1.** Fits of the FeSSi-Algal model to cultures in exponential growth phase (Day 1 cultures) to algal biomass (a) and DOC concentration (b) and the model predictions for the concentration of bioavailable FeSSi through time (up to day 5, at which time all of the FeSSi is inactivated)

**a) 11 day old cultures - algal population and bioavailable FeSSi concentration**

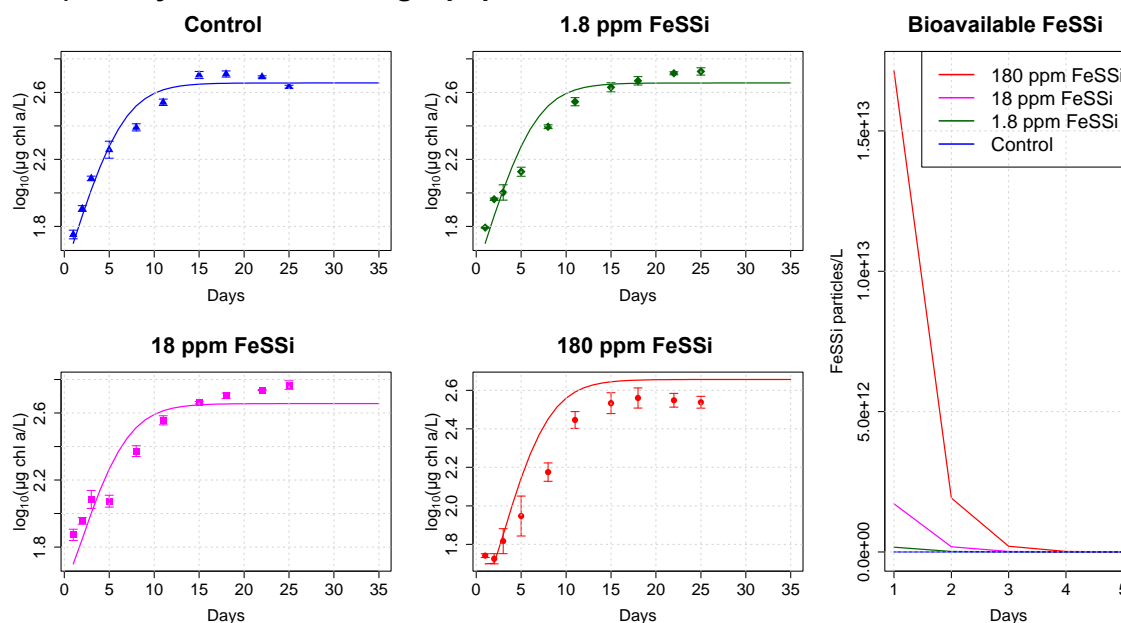

**b) 11 day old cultures - algal population and bioavailable FeSSi concentration**

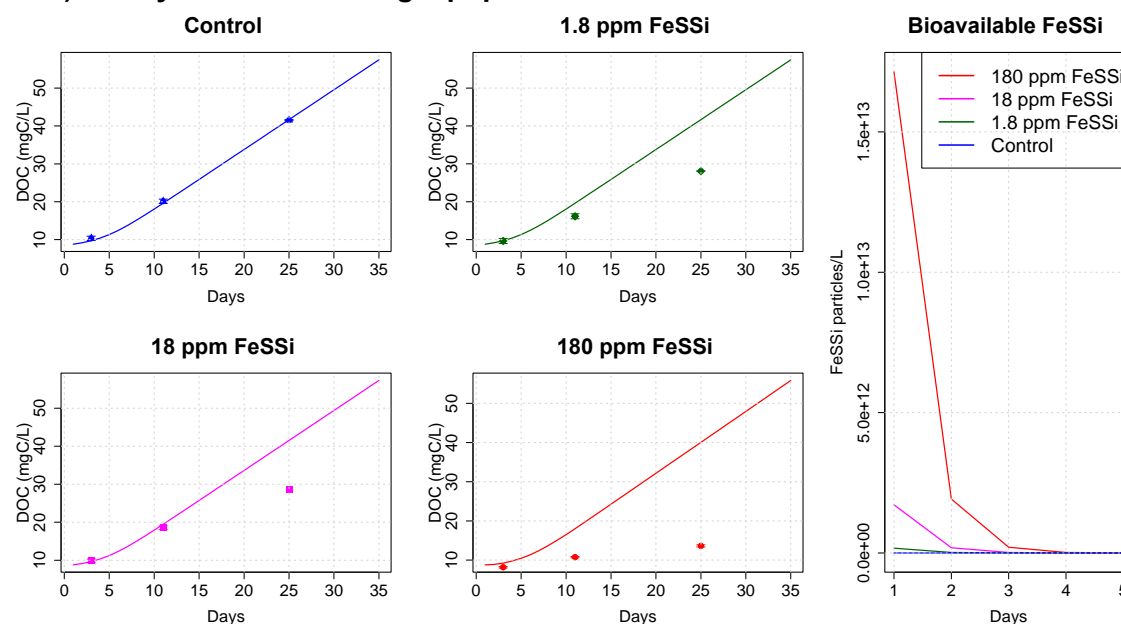

**Figure S2.** Fits of the FeSSi-Algal model to cultures in slowing growth phase (Day 1 cultures) to algal biomass (a) and DOC concentration (b) and the model predictions for the concentration of bioavailable FeSSi through time (up to day 5, at which time all of the FeSSi is inactivated)

**Table S2.** Dynamic FeSSi algal model

| State Variables                                       |                                              |
|-------------------------------------------------------|----------------------------------------------|
| N                                                     | Algal biomass ( $\mu\text{g chl a/L}$ )      |
| D                                                     | DOC concentration ( $\text{mgC/L}$ )         |
| $C_N$                                                 | bioavailable FeSSi (FeSSi particles/L)       |
| $C_U$                                                 | FeSSi inactivated by DOC (FeSSi particles/L) |
| Functions                                             |                                              |
| $J_{UN} = g_{UN}DC_N$                                 | Inactivation of FeSSi by DOC                 |
| $P_D = k_{DN}N + h_{DN}\frac{dN}{dt}$                 | DOC production                               |
| $m = k_fC_N$                                          | Mortality due to FeSSi exposure              |
| Balance equations                                     |                                              |
| $\frac{dN}{dt} = rN\left(1 - \frac{N}{K}\right) - mN$ | Algal biomass                                |
| $\frac{dD}{dt} = P_D - bJ_{UN}$                       | DOC                                          |
| $\frac{dC_N}{dt} = -J_{UN}$                           | Bioavailable FeSSi                           |
| $\frac{dC_U}{dt} = J_{UN}$                            | Inactivated FeSSi                            |

**Table S3.** Parameters for FeSSi-algal model

| Parameters           |                                                             |                                                                            |
|----------------------|-------------------------------------------------------------|----------------------------------------------------------------------------|
| r                    | algal intrinsic growth rate                                 | 0.44 1/day                                                                 |
| K                    | algal carrying capacity                                     | 453 $\mu\text{g chl a} / \text{L}$                                         |
| $k_f$                | FeSSi toxicity parameter                                    | $5.576 \cdot 10^{-6} (\text{day} \cdot \text{L}) / \text{FeSSi particles}$ |
| $k_{\text{DN}}$      | parameter in DOC<br>production rate                         | $0.003484 \text{ mgC} / (\text{ug chl a} \cdot \text{day})$                |
| $h_{\text{DN}}$      | parameter in DOC<br>production rate                         | $0.0072 \text{ mgC} / \text{ug chl a}$                                     |
| $\gamma_{\text{UN}}$ | FeSSi inactivation rate<br>Loss of DOC due to               | $0.2484 \text{ L} / (\text{mgC} \cdot \text{day})$                         |
| $\beta$              | heteroaggregation with<br>FeSSi<br>Initial concentration of | $4.069 \cdot 10^{-7} \text{ mgC} / \text{FeSSi particles}$                 |
| $C_{\text{N11}}(0)$  | bioavailable FeSSi exposed<br>to 11 day old cultures        | $1.75 \cdot 10^{13} \text{ FeSSi particles} / \text{L}$                    |

### **S5.0 Environmental Scanning Electron Microscopy (ESEM)**

At the end of the experiments, 1 mL of 11-d *C. reinhardtii* cultures dosed with 180 mg/L of FeSSi was fixed with formalin (5%). The suspension was allowed to mix, deposited on a JEOL aluminum specimen mount, and then imaged using a Phillips FEI XL30 FEG ESEM equipped with a Bruker XFlash 6160 energy dispersive spectrometer (EDS). Imaging was done in wet mode at 3 Torr, 4 °C, and an accelerating voltage of 10 kV.



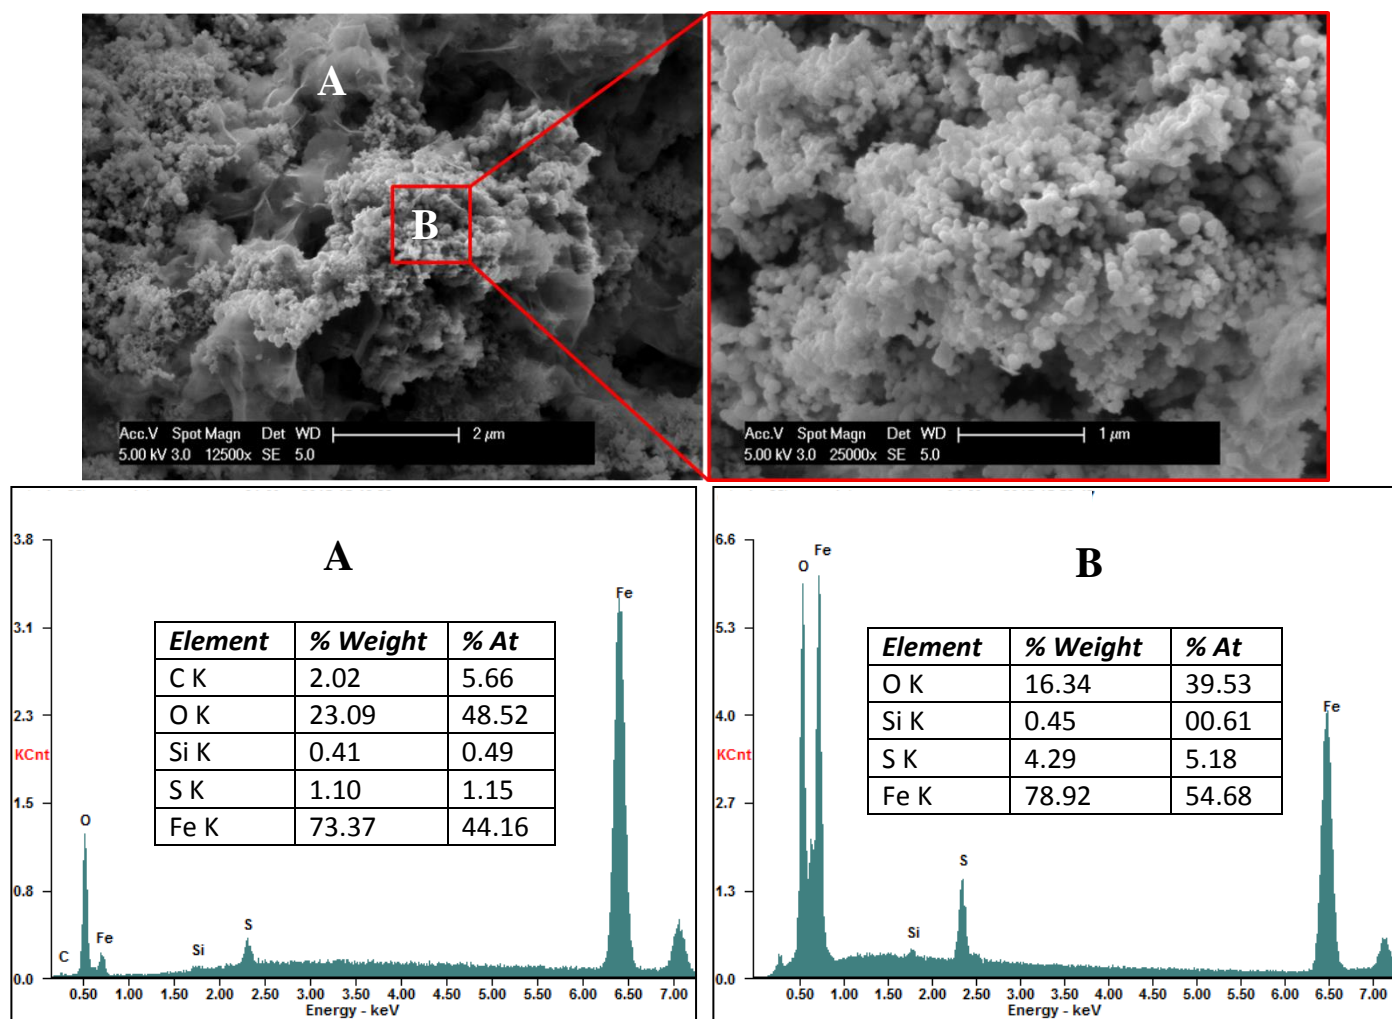

**Figure S3.** Scanning electron micrographs and EDS spectra of the surface of pristine FeSSi showing different states of iron, fully oxidized (A), and partially oxidized (B)

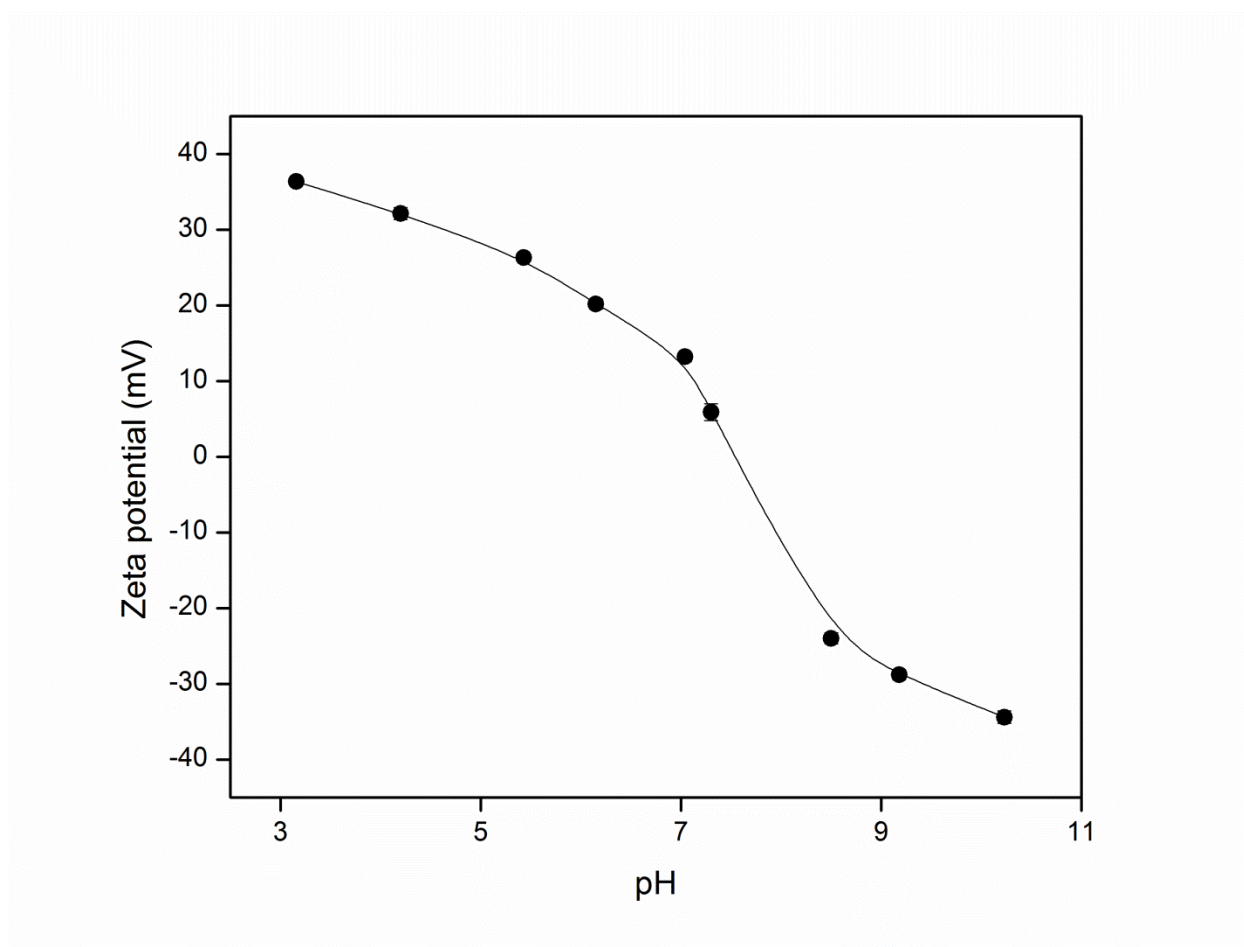

**Figure S4.** Effect of pH on zeta potential of FeSSi. Isoelectric point (IEP)  $\approx$  pH 7.4

## Effect of algal organic matter on aggregation of FeSSi

Hydrodynamic diameter

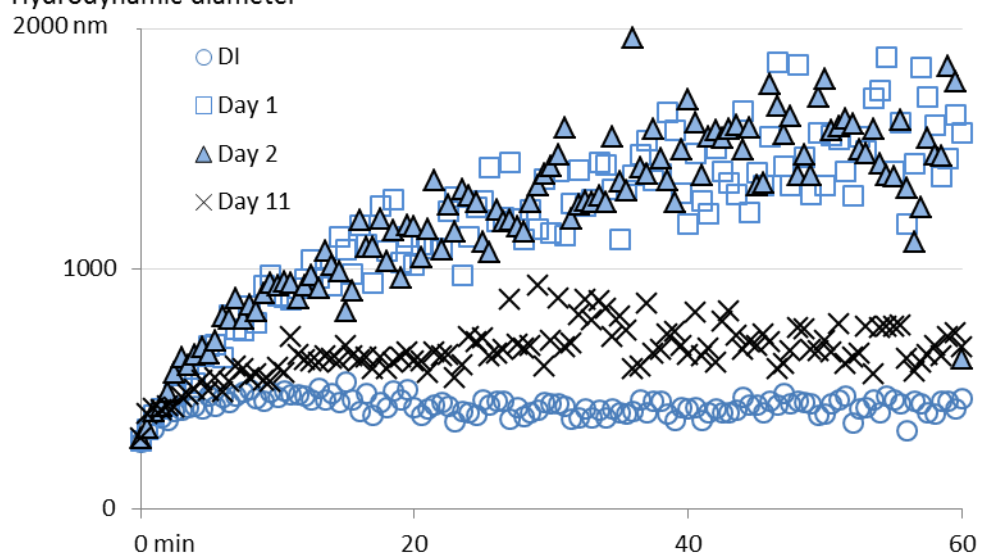

**Figure S5.** Aggregation kinetics of FeSSi in DI, Day 1 (1-d), Day 2 (2-d), and Day 11 (11-d) media

**Table S4.** Properties of media with and without *C. reinhardtii* cells

| Property                        | Day 1 media | Day 2 media |                            | Day 11 media |                            |
|---------------------------------|-------------|-------------|----------------------------|--------------|----------------------------|
|                                 |             | With cells  | Without <sup>a</sup> cells | With cells   | Without <sup>a</sup> cells |
| Dissolved organic carbon (mg/L) | 1.83        | Nd          | 2.19                       | nd           | 5.58                       |
| Total dissolved nitrogen (mg/L) | 18.8        | Nd          | 16.3                       | nd           | 6.30                       |
| Dissolved oxygen (mg/L)         | 8.43        | 8.98        | 8.47                       | 9.42         | 8.92                       |
| Phosphorus (mg/L)               | 4.50        | Nd          | 4.10                       | nd           | 0.07                       |
| pH                              | 7.6         | 7.8         | 7.7                        | 10.5         | 10.4                       |
| Conductivity (µS/cm)            | 272         | 284         | 283                        | 284          | 298                        |

<sup>a</sup> Cells were removed by centrifugation followed by 0.2 µm filtration under sterile conditions

nd = Not determined

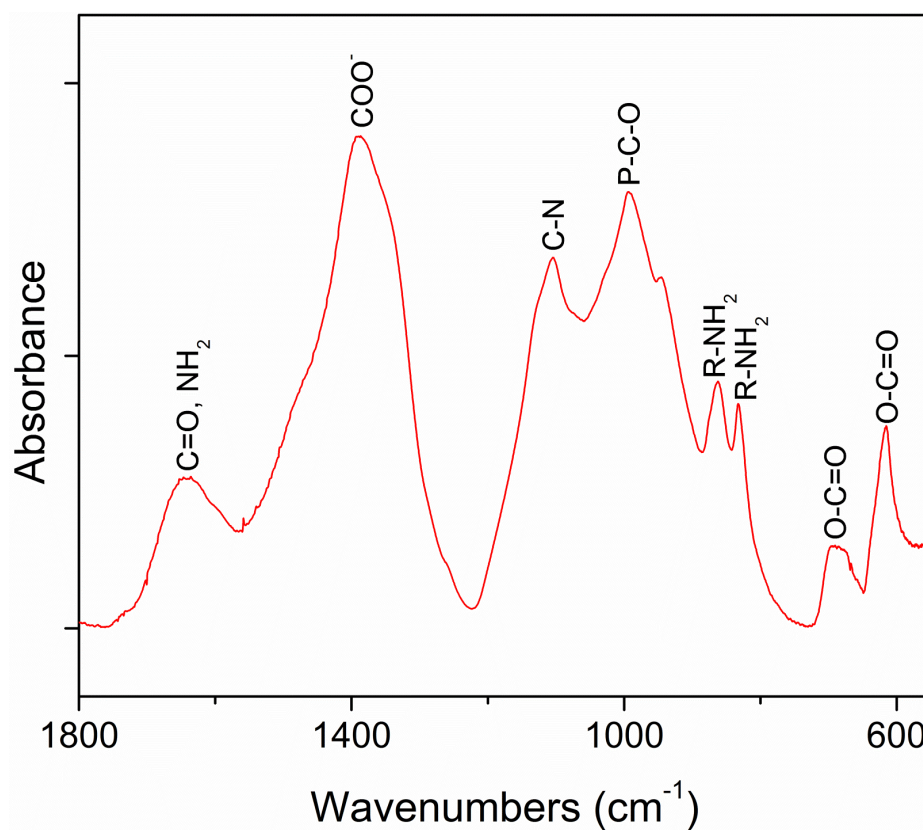

**Figure S6.** FTIR spectrum of organic matter produced by *Chlamydomonas reinhardtii*. Detailed band assignments are provided in SI Table S2

**Table S5.** Band assignments for FTIR spectrum of organic matter produced by *Chlamydomonas reinhardtii*

| Wavenumber (cm <sup>-1</sup> ) | Functional group/assignment                                   |
|--------------------------------|---------------------------------------------------------------|
| 530                            | NO <sub>2</sub> deformation                                   |
| 615                            | C=O out-of-plane bend in amides                               |
| 690                            | O-C=O bending in carboxylic acids                             |
| 833                            | NH <sub>2</sub> wag primary amines                            |
| 862                            | NH <sub>2</sub> wag primary amines                            |
| 945                            | P-O-C antisym stretch in organophosphorus compounds           |
| 993                            | P-O-C antisym stretch in organophosphorus compounds           |
| 1104                           | C-O, C-O-C stretching of polysaccharides                      |
| 1387                           | COO- symmetric stretch                                        |
| 1636                           | C=O stretch and NH <sub>2</sub> deformation in primary amides |

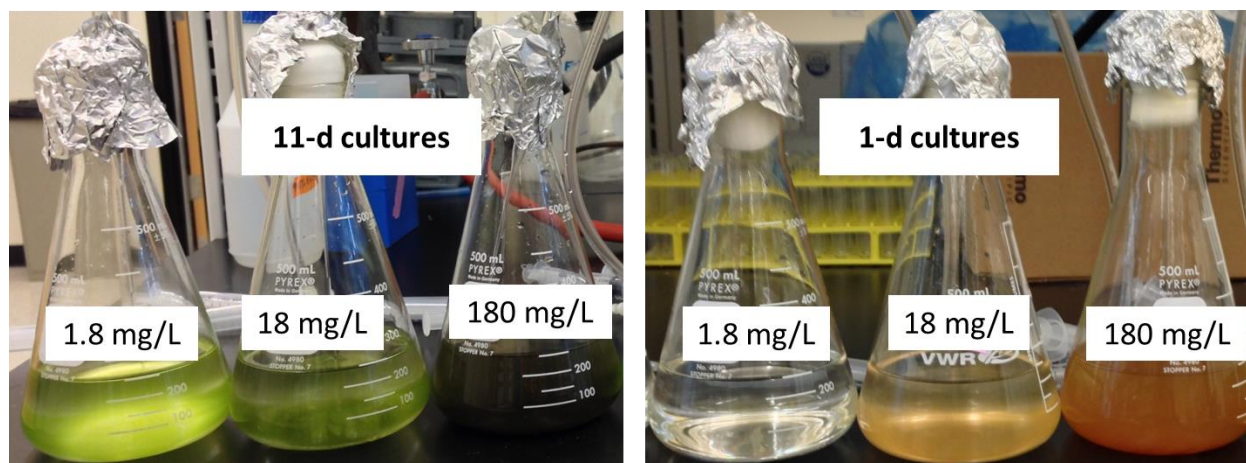

**Figure S7.** FeSSi in Day 1 and Day 11 *C. reinhardtii* media right after dosing with nanoparticles. FeSSi stock was stirred in either Day 1 or Day 11 media before dosing

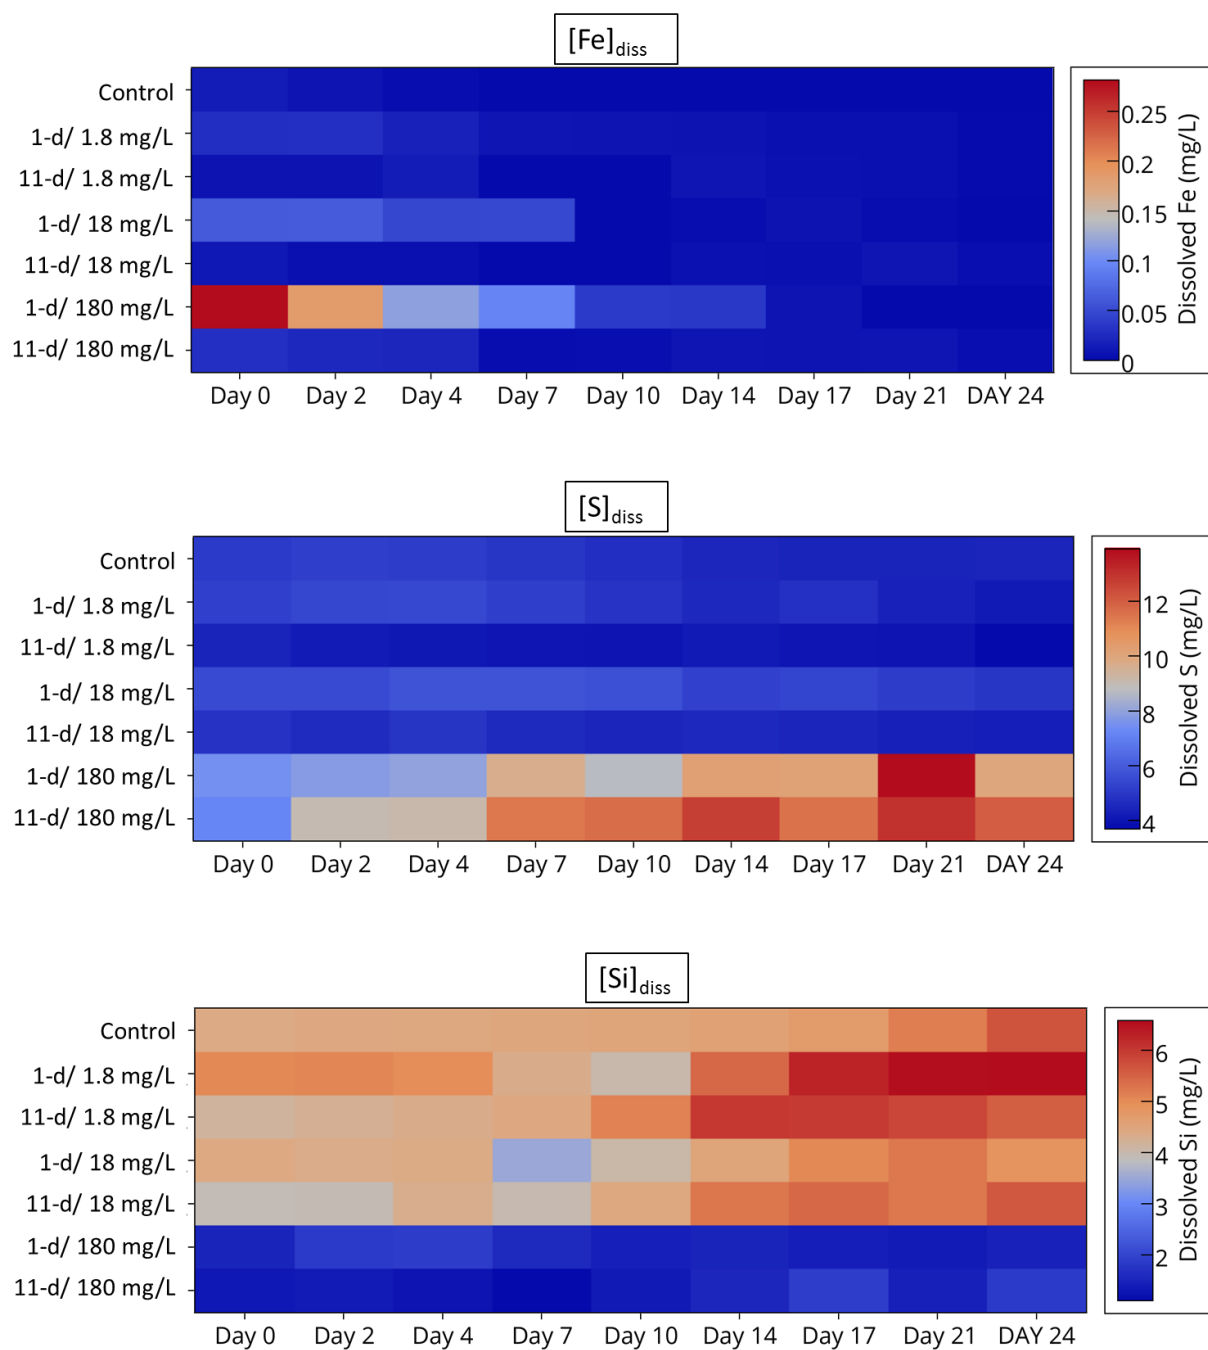

**Figure S8.** Concentrations of dissolved Fe, S, and Si detected in 1-d and 11-d cultures of *C. reinhardtii* in the presence of 1.8, 18, and 180 mg/L of FeSSi particles



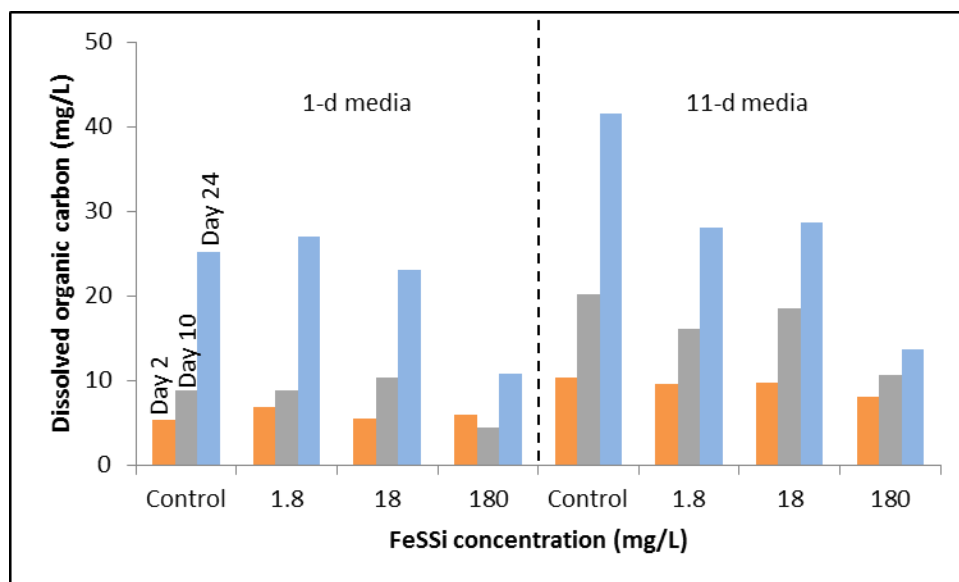

**Figure S9.** Dissolved organic carbon (DOC), a proxy for algal organic matter, in aqueous phase of *C. reinhardtii* cultures

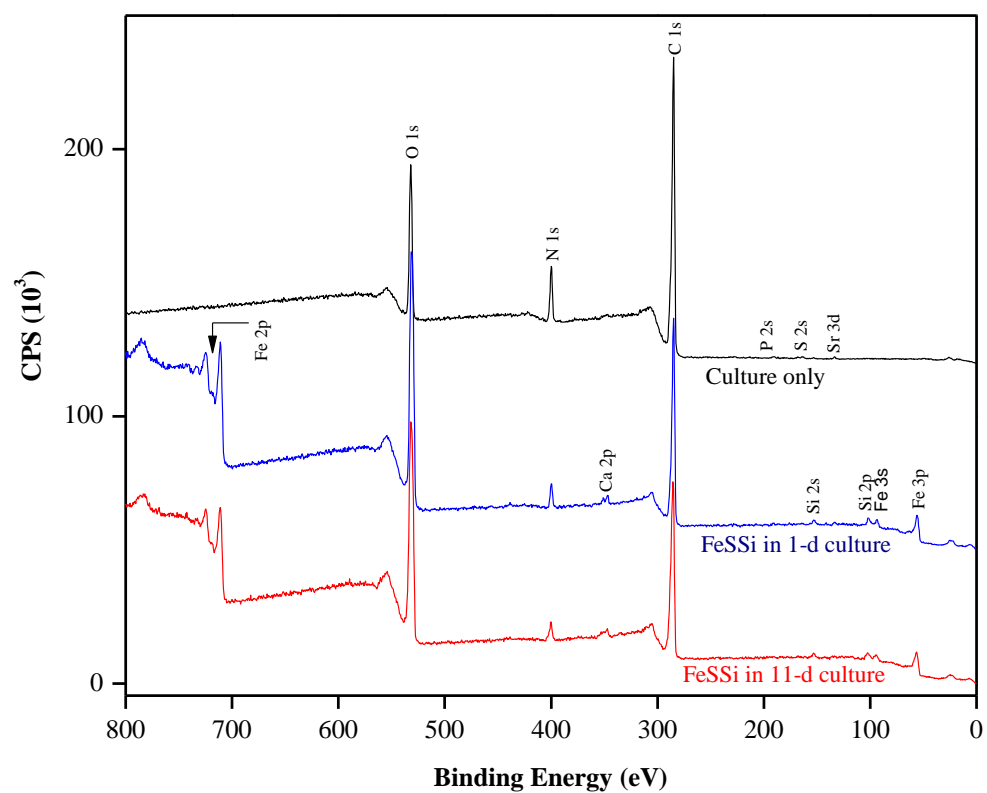

**Figure S10.** XPS spectra of *C. reinhardtii* culture cells in the presence and absence of FeSSi

**Table S6.** Elemental composition of solid phase via XPS analyses

| Name  | Culture | % Mass concentration  |        |        |                      |        |        |
|-------|---------|-----------------------|--------|--------|----------------------|--------|--------|
|       | Day 10  | FeSSi + 11-d cultures |        |        | FeSSi + 1-d cultures |        |        |
|       |         | Day 2                 | Day 10 | Day 30 | Day 2                | Day 10 | Day 30 |
| Fe 2p | 0       | 38.9                  | 11.88  | 10.51  | 21.23                | 22.56  | 11.67  |
| O 1s  | 20.84   | 39.73                 | 44.32  | 37.68  | 53.78                | 54.62  | 38.82  |
| Si 2s | 0       | 2.79                  | 1.93   | 1.5    | 3.5                  | 3.25   | 2.21   |
| C 1s  | 71.68   | 15.85                 | 36.62  | 45.87  | 17.16                | 16.57  | 41.99  |
| Ca 2p | 0       | 0.94                  | 1.65   | 1.26   | 0.84                 | 0.82   | 1.21   |
| P 2s  | 0.47    | 0.44                  | 0.49   | 0.56   | 1.92                 | 0.63   | 0.54   |
| N 1s  | 6.53    | 0.72                  | 2.62   | 2.11   | 0.28                 | 0.21   | 2.78   |
| Sr 3d | 0.24    | 0.45                  | 0.29   | 0.38   | 1.11                 | 1.34   | 0.78   |
| S 2p  | 0.23    | 0.18                  | 0.2    | 0.14   | 0.19                 | 0      | 0      |

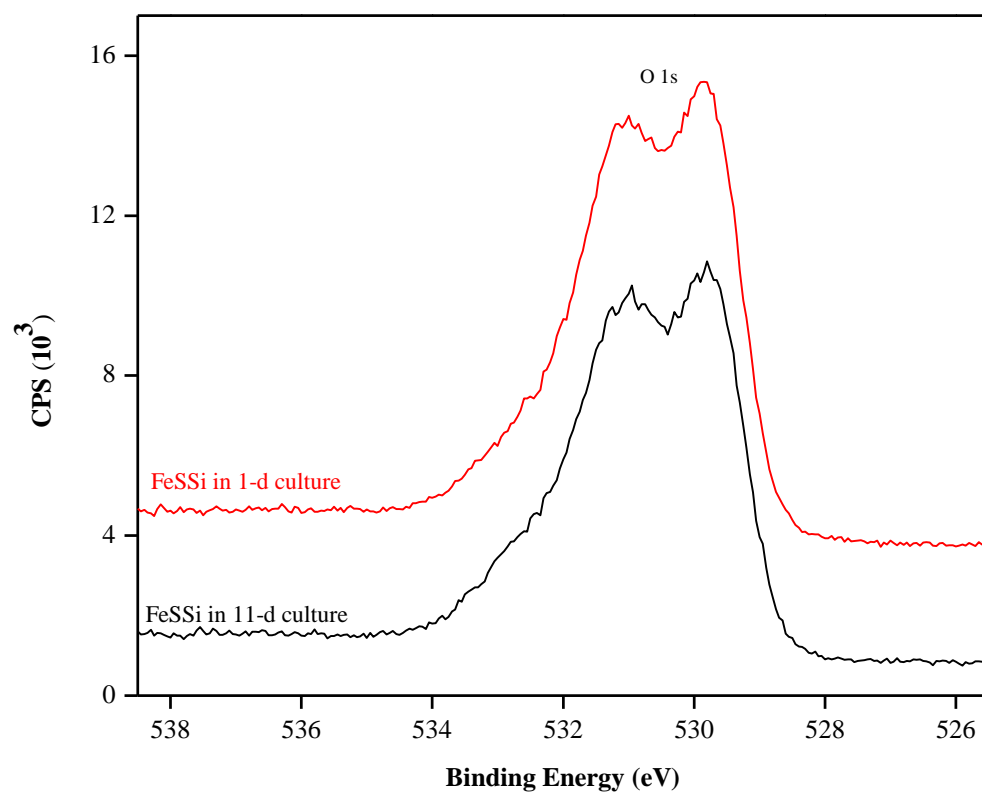

**Figure S11.** High resolution scans of O 1s in 1-d and 11-d cultures

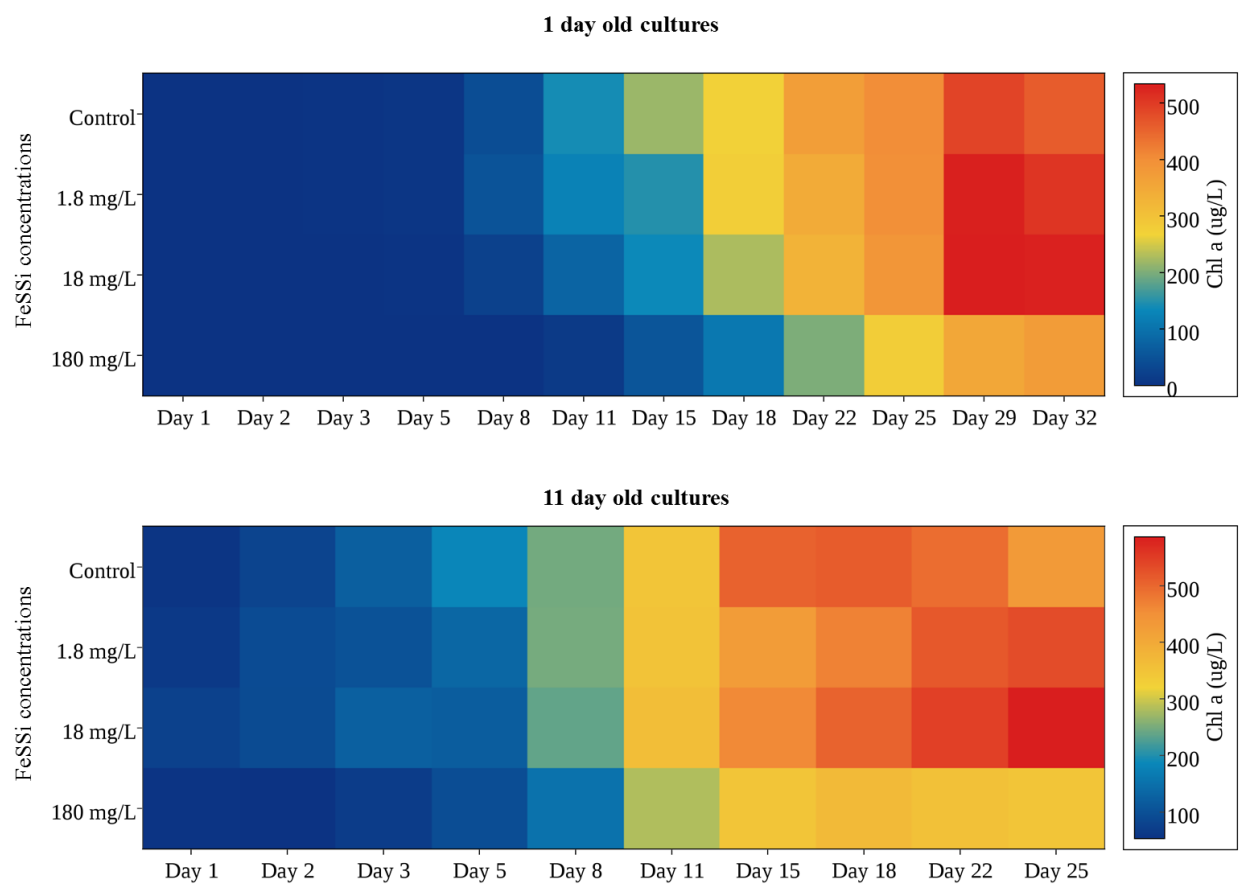

**Figure S12.** Nominal concentrations of chlorophyll a (Chl a) detected after exposure of FeSSi to *C. reinhardtii* at exponential (1-d) and slowing growth (11-d) phases

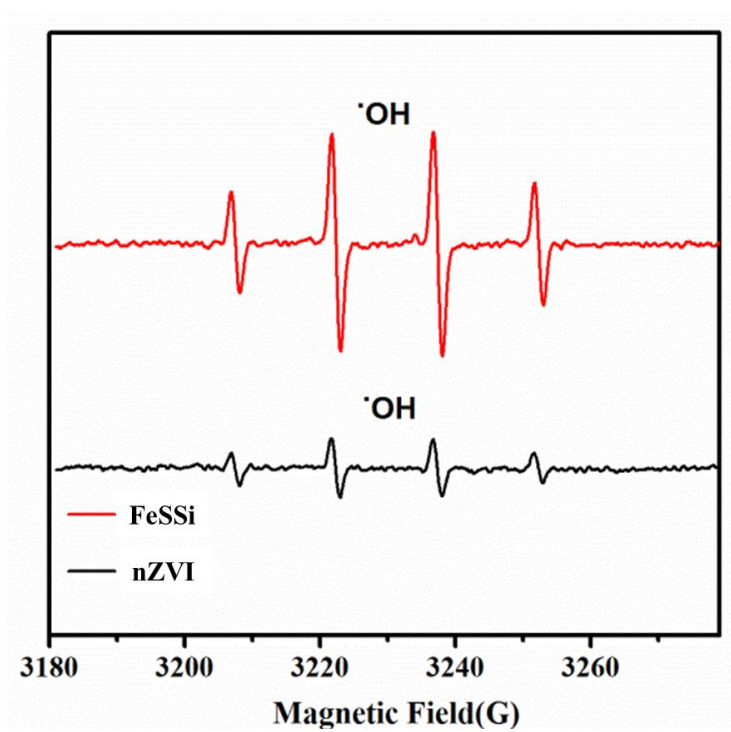

Figure S13. Electron spin resonance (ESR) spectra of FeSSi and nZVI showing the production of reactive oxygen species (ROS).
